# Supplementary material for: Implantable, 3D-Printed Alginate Scaffolds with Bismuth Sulfide Nanoparticles for the Treatment of Local Breast Cancer via Enhanced Radiotherapy
Source: PubMed Central journal article supplement (PMC10995896; doi:10.1021/acsami.3c17024), 2024-03-20
Supplement: am3c17024_si_002.pdf [file am3c17024_si_002.pdf]

## Supporting Information

### **Implantable, 3D-Printed Alginate Scaffolds with Bismuth Sulfide Nanoparticles for the Treatment of Local Breast Cancer via Enhanced Radiotherapy**

**Busra Colak<sup>1,2</sup>, Yavuz Nuri Ertas<sup>1,2,3\*</sup>**

<sup>1</sup> ERNAM—Nanotechnology Research and Application Center, Erciyes University, Kayseri 38039, Türkiye

<sup>2</sup> Department of Biomedical Engineering, Erciyes University, Kayseri 38039, Türkiye

<sup>3</sup> UNAM—Institute of Materials Science and Nanotechnology, Bilkent University, Ankara 06800, Türkiye

\*Corresponding Author:

Yavuz Nuri Ertas, Ph.D.

ERNAM—Nanotechnology Research and Application Center, Erciyes University, Kayseri 38039, Türkiye

Email: [yavuznuri@gmail.com](mailto:yavuznuri@gmail.com)

Web: [www.ertaslab.com](http://www.ertaslab.com)

## Supporting Figures

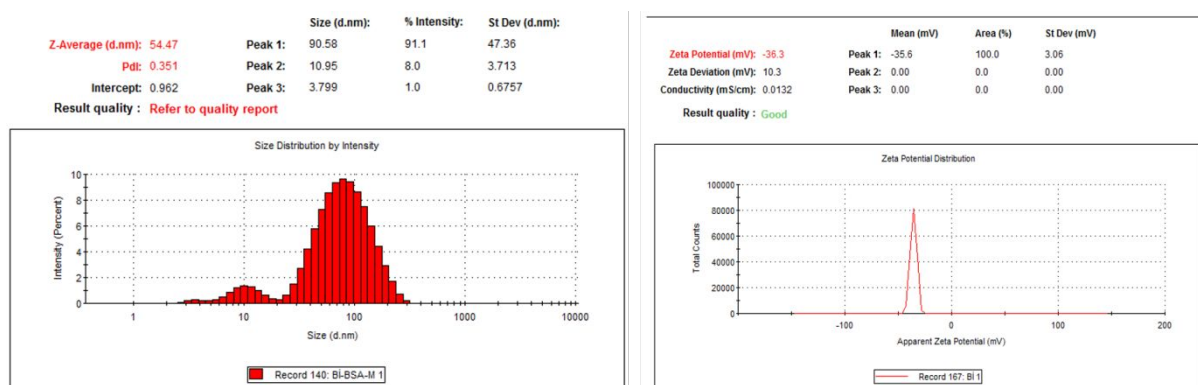

**Figure S1.** DLS analysis of Bi<sub>2</sub>S<sub>3</sub>@BSA nanoparticles.

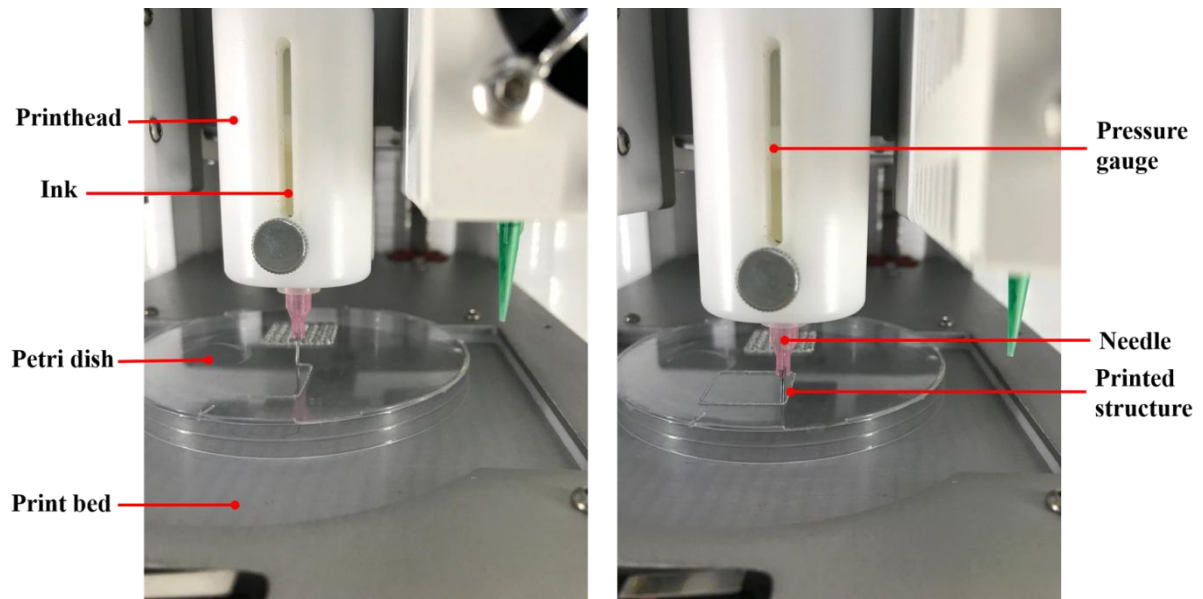

**Figure S2.** Components of the Axo A3 Bioprinting device.

**Table S1.** 3D printing parameters of the four different hydrogels.

| <b>Conditions</b>                  | <b>Alginate<br/>(Alg)</b> | <b>Alg-<br/>Bi<sub>2</sub>S<sub>3</sub>@BSA<br/>(0.25%)</b> | <b>Alg-<br/>Bi<sub>2</sub>S<sub>3</sub>@BSA<br/>(0.5%)</b> | <b>Alg-<br/>Bi<sub>2</sub>S<sub>3</sub>@BSA<br/>(1%)</b> |
|------------------------------------|---------------------------|-------------------------------------------------------------|------------------------------------------------------------|----------------------------------------------------------|
| <b>Needle size (G)</b>             | 25 G                      | 25 G                                                        | 25 G                                                       | 25 G                                                     |
| <b>Pressure (kPa)</b>              | 4.1                       | 5.1                                                         | 5.8                                                        | 6.1                                                      |
| <b>Speed (mm/s)</b>                | 100                       | 100                                                         | 100                                                        | 100                                                      |
| <b>Density</b>                     | 40%                       | 40%                                                         | 40%                                                        | 40%                                                      |
| <b>Print-head temperature (°C)</b> | -                         | -                                                           | -                                                          | -                                                        |
| <b>Print-bed temperature (°C)</b>  | 4                         | 4                                                           | 4                                                          | 4                                                        |

**a**

| Element | Weight % | Atomic % | Net Int. | Error % | Kratio | Z      | A      | F      |
|---------|----------|----------|----------|---------|--------|--------|--------|--------|
| C K     | 13.75    | 17.69    | 172.90   | 12.94   | 0.0646 | 1.0431 | 0.4500 | 1.0000 |
| N K     | 0.02     | 0.03     | 0.30     | 99.99   | 0.0001 | 1.0186 | 0.3057 | 1.0000 |
| O K     | 85.12    | 82.20    | 2976.10  | 6.76    | 0.4480 | 0.9974 | 0.5277 | 1.0000 |
| BiM     | 1.11     | 0.08     | 26.50    | 7.32    | 0.0088 | 0.5851 | 1.3634 | 0.9959 |

**b**

| Element | Weight % | Atomic % | Net Int. | Error % | Kratio | Z      | A      | F      |
|---------|----------|----------|----------|---------|--------|--------|--------|--------|
| C K     | 23.32    | 29.68    | 65.80    | 7.30    | 0.1185 | 1.0462 | 0.4857 | 1.0000 |
| N K     | 0.00     | 0.00     | 0.00     | 99.99   | 0.0000 | 1.0219 | 0.2074 | 1.0000 |
| O K     | 73.35    | 70.08    | 370.40   | 7.59    | 0.2690 | 1.0008 | 0.3665 | 1.0000 |
| BiM     | 3.33     | 0.24     | 16.60    | 4.87    | 0.0267 | 0.5878 | 1.3675 | 0.9964 |

**c**

| Element | Weight % | Atomic % | Net Int. | Error % | Kratio | Z      | A      | F      |
|---------|----------|----------|----------|---------|--------|--------|--------|--------|
| C K     | 23.98    | 30.50    | 65.30    | 7.28    | 0.1226 | 1.0464 | 0.4884 | 1.0000 |
| N K     | 0.00     | 0.00     | 0.00     | 99.99   | 0.0000 | 1.0221 | 0.2028 | 1.0000 |
| O K     | 72.53    | 69.25    | 344.00   | 7.68    | 0.2603 | 1.0010 | 0.3584 | 1.0000 |
| BiM     | 3.48     | 0.25     | 16.70    | 4.88    | 0.0279 | 0.5880 | 1.3678 | 0.9965 |

**Figure S3.** The data of main elements (C, N, O and Bi) amount in the scaffolds. (a) Alg-Bi<sub>2</sub>S<sub>3</sub>@BSA (0.25%), (b) Alg-Bi<sub>2</sub>S<sub>3</sub>@BSA (0.5%), (c) Alg-Bi<sub>2</sub>S<sub>3</sub>@BSA (1%).

**Table S2.** *In vitro* degradation groups.

| <b>Scaffold Type</b>                                   | <b>Medium</b> | <b>pH</b> | <b>Temperature</b> |
|--------------------------------------------------------|---------------|-----------|--------------------|
| <b>Alginate (Alg)</b>                                  | PBS (1 ml)    | 7.4       | 37 °C              |
| <b>Alg-Bi<sub>2</sub>S<sub>3</sub>@BSA<br/>(0.25%)</b> | PBS (1 ml)    | 7.4       | 37 °C              |
| <b>Alg-Bi<sub>2</sub>S<sub>3</sub>@BSA (0.5%)</b>      | PBS (1 ml)    | 7.4       | 37 °C              |
| <b>Alg-Bi<sub>2</sub>S<sub>3</sub>@BSA (1%)</b>        | PBS (1 ml)    | 7.4       | 37 °C              |

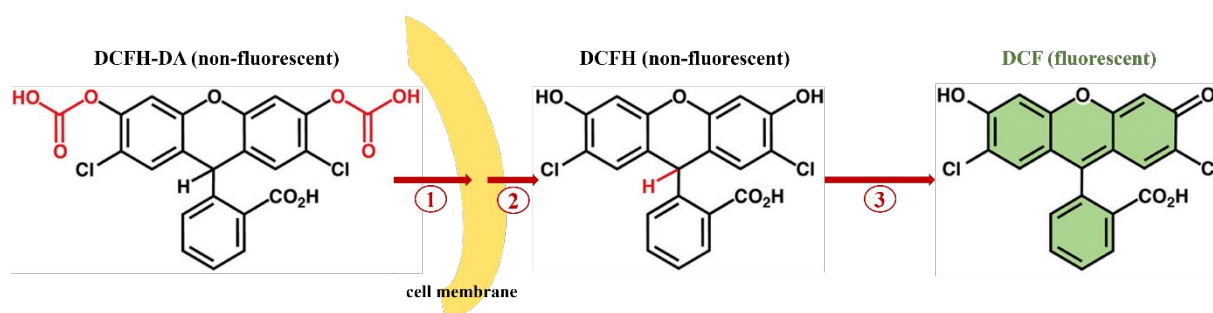

**Figure S4.** DCFH-DA is taken up by cells (1) where cellular esterase cleaves off the acetyl groups, resulting in DCFH (2). Oxidation of DCFH by ROS (such as  $^1\text{O}_2$ ,  $\text{H}_2\text{O}_2$ ,  $\text{OH}\cdot$ ) converts the molecule to DCF (3), which emits green fluorescence at an excitation wavelength of 485 nm and an emission wavelength of 530 nm.
